# Supplementary material for: Closed-state inactivation involving an internal gate in Kv4.1 channels modulates pore blockade by intracellular quaternary ammonium ions
Source: PubMed Central journal article supplement (PMC4977472; doi:10.1038/srep31131), 2016-08-09
Supplement: srep31131-s1.pdf [file srep31131-s1.pdf]

1 **Supplementary Information**

2  
3 **Closed-state inactivation involving an internal gate in Kv4.1 channels modulates**  
4 **pore blockade by intracellular quaternary ammonium ions**

5  
6 Jeffrey D. Fineberg<sup>1,3</sup> Tibor G. Szanto<sup>4</sup>, Gyorgy Panyi<sup>4,5</sup> and Manuel Covarrubias<sup>1,2,3</sup>

7 <sup>1</sup>Department of Neuroscience, <sup>2</sup>Vickie and Jack Farber Institute for Neuroscience and

8 <sup>3</sup>Graduate Program in Molecular Physiology & Biophysics

9 Sidney Kimmel Medical College at Thomas Jefferson University

10 Philadelphia, PA 19107

11 <sup>4</sup>Department of Biophysics & Cell Biology, Faculty of Medicine,

12 University of Debrecen, Hungary

13 <sup>5</sup>MTA-DE-NAP B Ion Channel Structure-Function Research Group, RCMM,

14 University of Debrecen, Hungary

15 4032 Debrecen, Hungary

16

17

18

19

## Supplementary Figures

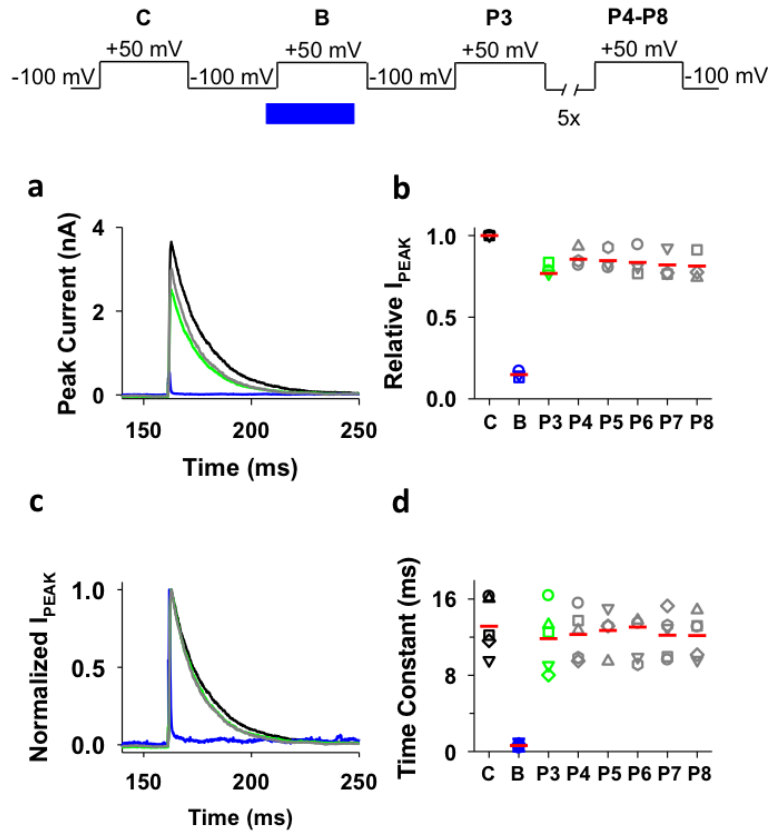

21

22 **Figure 1S. Inactivation of the Shaker-IR T449K channel cannot trap internally applied**  
 23 **bTBuA but acts as an open-channel blocker.** T449K channels were transiently expressed in  
 24 *tsA-201* cells (see Methods). (a) Outward currents evoked by a step to +50 mV from a holding  
 25 voltage of -100 mV in the inside-out patch configuration. The overlaid traces depict the current  
 26 profile before (P1, C=control, black), during (P2, B=block, blue) and after (P3, green, and P4-  
 27 P8, grey) the exposure of the intracellular side of the channel to 100  $\mu$ M bTBuA (only a 100-  
 28 ms-long-segment of the currents is shown for clarity). The exposure to the QA ion began before  
 29 B and was terminated after macroscopic inactivation reached steady-state (*solid* blue bar in  
 30 protocol scheme above panel a). Note that no exposure was allowed during the repolarizing  
 31 step that closes the channels. (b) Scatter plots of the normalized peak current amplitudes.  
 32 Horizontal bars indicate the mean of N experiments. (c) Currents in panel (a) were normalized  
 33 to their respective peak and shown as a function of time. Color code is the same as in panel  
 34 (a). (d) Scatter plot of the individual time constants obtained from currents evoked by pulses  
 35 C, B, and P3-P8 (see above) and the mean of the time constants (horizontal bars). Inactivation  
 36 time constants were determined as described in Fig. 6 legend.

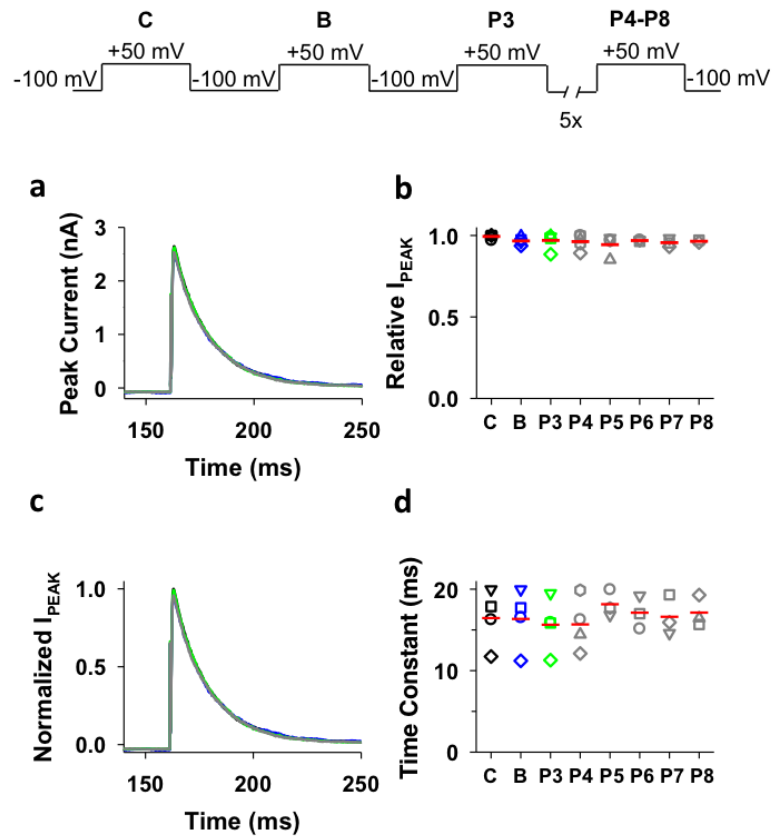

37

38 **Figure 2S. Shaker-IR T449K channels are relatively stable in the absence of bTBuA.** (a)  
 39 Inside-out patches (*tsA-201 cells*) were repeatedly depolarized from a holding potential of  
 40  $-100$  to  $+50$  mV by using the pulse protocols shown in Fig. 2. The first 180-ms-segments of  
 41 the 5-s-long traces are shown for clarity. (b) Scatter plots of the normalized peak current  
 42 amplitudes. Horizontal bars indicate the mean of N experiments. (c) Normalized currents from  
 43 panel (a). The peak currents for each pulse were determined and normalized to the peak current  
 44 recorded during the first pulse (C). The peak of the normalized currents was typically  $\geq 0.9$ . (d)  
 45 Scatter plot of the individual time constants obtained from currents evoked by pulses C, B, and  
 46 P3-P8 (see above) and the mean of the time constants (horizontal bars). Inactivation time  
 47 constants were determined as described in Fig. 6 legend.

48

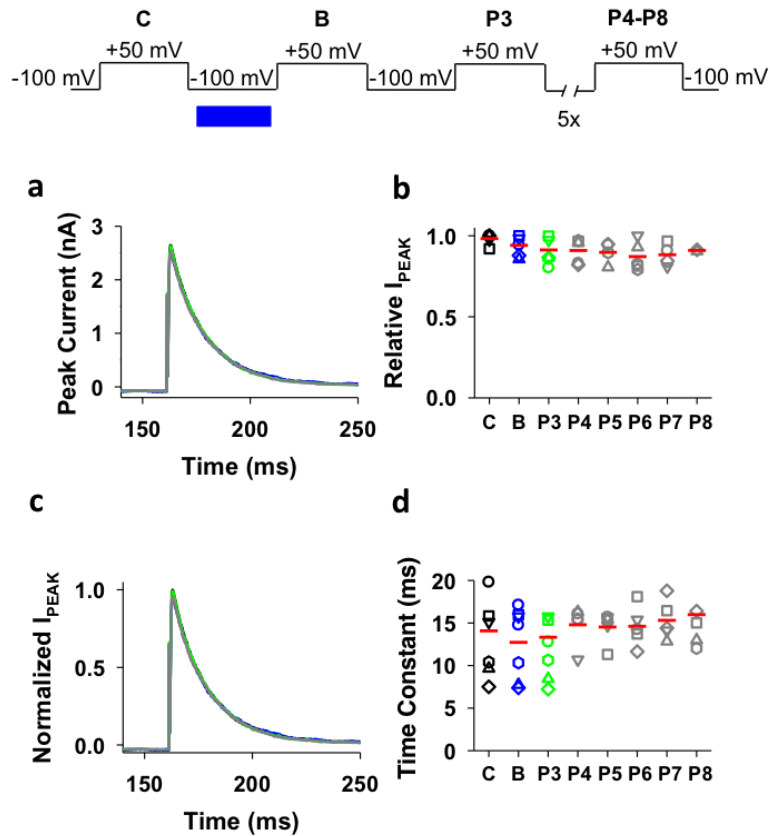

49

50 **Figure 3S. Internally applied bTBuA does not block closed Shaker-IR T449K channels.**

51 Inside-out patch current recording from *tsA201* cells. (a) The channels were held closed at a  
 52 holding potential of -100 mV, and their activity were monitored using 5-s-long activating  
 53 pulses to +50 mV every 5 s. The intracellular surface of the patch was exposed to 100  $\mu$ M  
 54 bTBuA for 4 s during the holding potential between C and B as indicated by the *solid* blue bar.  
 55 bTBuA was applied after the channels closed completely at the holding potential following C  
 56 and the drug was completely washed out before B. The overlaid traces depict the current profile  
 57 during C (black), B (blue) and P3 (green) (only 100-ms-long segment of the currents is shown  
 58 for clarity). (b) Scatter plot of normalized peak currents. Horizontal lines indicate mean of N  
 59 individual experiments. (c) Peak currents for each pulse were normalized to the peak current  
 60 measured during pulse P1(C). The peak of the normalized currents was typically  $\geq 0.9$ . (d)  
 61 Scatter plot of the individual time constants obtained from currents evoked by pulses C, B, and  
 62 P3-P8 (see above) and the mean of the time constants (horizontal bars). Inactivation time  
 63 constants were determined as described in Fig. 6 legend.

64

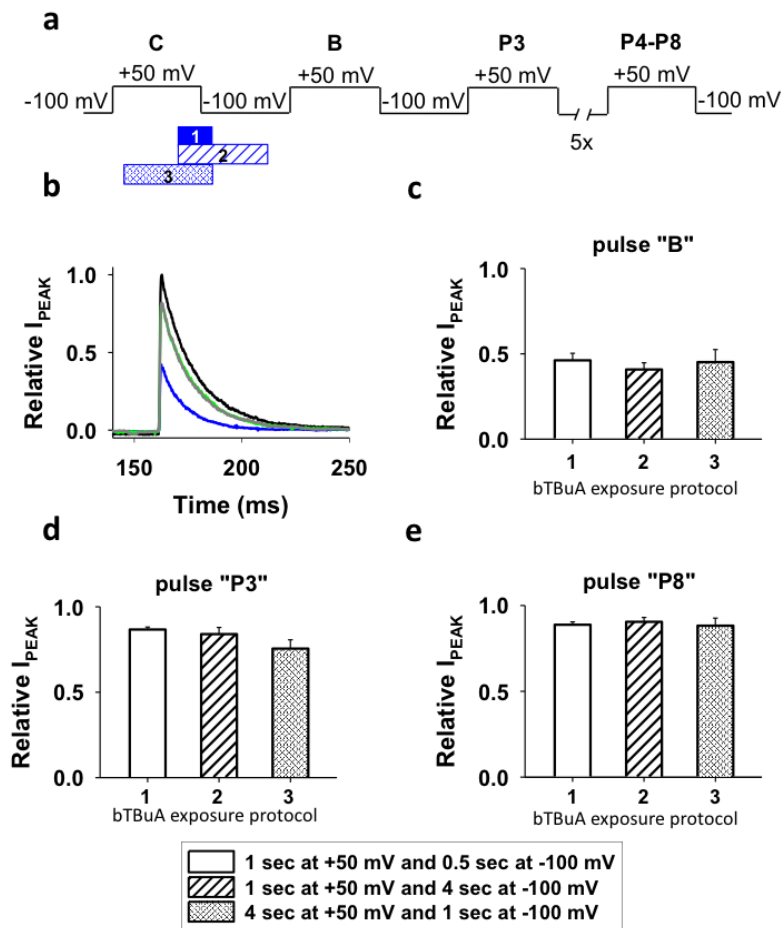

65

66 **Figure 4S. Silent blockade by bTBuA in the open-inactivated and closed states does not**  
 67 **depend on duration of exposure to the blocker. (a)** Voltage-clamp protocol to probe for  
 68 bTBuA ion trapping by inactivation. **(b)** Macroscopic outward currents were recorded in  
 69 inside-out patches from *tsA-201* cells. The patches were repeatedly depolarized from a holding  
 70 potential of  $-100$  to  $+50$  mV for 5 s to ensure complete inactivation. The nomenclature of the  
 71 pulses in the sequence is in panel (a). The interpulse interval was 5 s and the patches were held  
 72 at the holding potential between the pulses. The intracellular side of the patch was exposed to  
 73  $100 \mu\text{M}$  intracellular bTBuA for 1 s at  $+50$  mV and 500 ms at  $-100$  mV (blue bar, 1), for 1 s at  
 74  $+50$  mV and 4 s at  $-100$  mV (blue hatched bar, 2) and 4 s at  $+50$  mV and 1 s at  $-100$  mV (blue  
 75 cross-hatched bar, 3), respectively. The overlaid traces depict the currents recorded in control  
 76 solution (C, black), during the first pulse following the exposure of the intracellular side of  
 77 inactivated channels to  $100 \mu\text{M}$  bTBuA (B, blue) and during subsequent pulses in control  
 78 solution (green, P3, and gray, P4-P8). Only 100-ms-long segment of the currents is shown for  
 79 clarity. **(c)**, **(d)** and **(e)** show the normalized peak current amplitudes measured during pulse B,  
 80 P3 and P8, respectively, under different timing and duration of the bTBuA exposure (see  
 81 above).
